# Supplementary material for: The COVID-19 Vaccines: Recent Development, Challenges and Prospects
Source: MDPI journal article supplement (doi:10.3390/vaccines9040349), 2021-04-05
Supplement: s1 [file s1]

**Table S1: Details of phase III clinical trials of different vaccines up to March 2021.**

| <b>Clinical trial code (Identifier No.)</b> | <b>Trial period</b>        | <b>Population</b> | <b>Study design</b>                                                                                  | <b>Targeted outcome measures /Primary findings</b>                                                                                                                                                                                                                                                                                           | <b>Remarks</b>                                                                                                                |
|---------------------------------------------|----------------------------|-------------------|------------------------------------------------------------------------------------------------------|----------------------------------------------------------------------------------------------------------------------------------------------------------------------------------------------------------------------------------------------------------------------------------------------------------------------------------------------|-------------------------------------------------------------------------------------------------------------------------------|
| 1a (NCT04368728) [1]                        | April 2020 – January 2023  | 43998             | Randomised, placebo-controlled, observer-blind, dose-finding                                         | Investigate local reactions, systemic events, adverse events (AEs), serious AEs (SAEs) and hematology [Time frame of 7 days after dose 1 and dose 2, and through 6 months after the last dose]<br>Measuring antibody level by Neutralising antibody Geometric mean titers (GMT), Geometric Mean Fold Rise (GMFR), Geometric Mean Ratio (GMR) | 95% effective in preventing COVID-19 in participants without evidence of prior SARS-CoV-2 infection based on interim analysis |
| 1b (NCT04713553) [2]                        | February 2021 – April 2022 | 1530              | Randomised, observer-blind                                                                           | Investigate antibody level, local reactions, systemic events, AEs and SAEs [Time frame of 7 days after dose 1 and dose 2, and through 1 month after the last dose]<br>Measuring antibody level by using Geometric Mean Ratio (GMR), GMFR and Geometric Mean Concentrations (GMCs)                                                            |                                                                                                                               |
| 1c (NCT04754594) [3]                        | February 2021 – June 2022  | 4000              | Randomised, placebo-controlled, observer-blind, 4000 healthy pregnant women 18 years of age or older | Investigate local reactions, systemic events, inferiority of immune response, AEs and SAEs [Time frame of 7 days after dose 1 and dose 2, and through 6 months after the last dose]                                                                                                                                                          |                                                                                                                               |
| 2a (NCT04470427) [4]                        | July 2020                  | 30420             | Randomised,                                                                                          | Investigate AEs, medically attended AEs                                                                                                                                                                                                                                                                                                      | Preliminary trial                                                                                                             |

|                      |                              |       |                                                                                    |                                                                                                                                                                                                                                                                                                                                                           |                                                                                                   |
|----------------------|------------------------------|-------|------------------------------------------------------------------------------------|-----------------------------------------------------------------------------------------------------------------------------------------------------------------------------------------------------------------------------------------------------------------------------------------------------------------------------------------------------------|---------------------------------------------------------------------------------------------------|
|                      | - October 2022               |       | stratified, observer-blind, placebo-controlled, adults aged 18 years and older     | (MAAEs), solicited local and systemic adverse reactions (ARs), unsolicited AEs and SAEs. [Time frame of day 8 to day 36, day 28, day 43 to day 759]<br>Measuring antibody level by using GMT and GMFR                                                                                                                                                     | result shows the vaccine is 94% effective in preventing COVID-19 as announced on November 16 [5]. |
| 2b (NCT04649151) [6] | December 2020 – June 2022    | 3000  | Randomised, observer-blind, placebo-controlled, adolescents 12 to <18 years of age | Investigate ARs, AEs, SAEs, MAAEs, AESI and number of participants infected. [Time frame of day 1, day 8, day 36, day 57, day 209, day 394]<br>Measuring antibody level by geometric mean value. [Time frame of day 1, day 57, day 209, day 394]                                                                                                          |                                                                                                   |
| 3a (NCT04456595) [7] | July 2020 – February 2022    | 12688 | Double-blind, randomised, placebo-controlled                                       | Investigate the frequency of AEs and incidence of COVID-19 cases. [Time frame of two weeks after the first dose up to one year after first dose, 7 days up to 28 days after each immunisation and from first vaccination up to one year after first dose]                                                                                                 |                                                                                                   |
| 3b (NCT04508075) [8] | August 2020 - September 2021 | 1620  | Randomised, observer-blind, placebo-controlled, 18-59 years of age                 | Investigate incidence of COVID-19 cases, SAEs, Local reaction and systemic events. [Time frame of 30 minutes to 14 days after each vaccination, 14 days to 6 months after the second dose]<br>Measuring the antibody level by using seroconversion (SC) rate and seropositive rate. [Time frame of 14 days up to 6 months after two doses of vaccination] |                                                                                                   |

|                               |                               |       |                                                                          |                                                                                                                                                                                                                                                                                                                                  |                                                                                        |
|-------------------------------|-------------------------------|-------|--------------------------------------------------------------------------|----------------------------------------------------------------------------------------------------------------------------------------------------------------------------------------------------------------------------------------------------------------------------------------------------------------------------------|----------------------------------------------------------------------------------------|
| 3c (NCT04582344) [9]          | September 2020 – April 2021   | 13000 | Randomised, double-blind, placebo-controlled                             | Investigate the protection indexes and safety indexes. [Time frame of 2 weeks after the second dose of vaccination, 7 days after each dose, 28 days up to 1 year after second dose]<br>Measuring the antibody level by using SC rate and seropositive rate. [Time frame of 14 days up to 28 days after two doses of vaccination] |                                                                                        |
| 4a (ChiCTR2000034780) [10]    | July 2020 – July 2021         | 15000 | Randomised, parallel assignment of vaccine for adults 18 years and above | To evaluate the protective effect 14 days after 2 doses of immunisation of preventing severe cases of SARS-CoV-2 pneumonia and deaths accompanied by COVID-19.                                                                                                                                                                   | Four-fold growth rate and antibody level (GMT, GMI) of serum antibody against COVID-19 |
| 5a (CTRI/2020/11/028976) [11] | November 2020 – November 2021 | 25800 | Randomised, parallel assignment of vaccine for adults 18 years and above | To evaluate the efficacy of BBV152B to prevent symptomatic COVID-19 (Virologically confirmed-(RT-PCR positive) which include any participant who meets the Case Definitions for Symptomatic Endpoint and Severe Symptomatic COVID-19 [Time frame of 42 days to 12 months]                                                        |                                                                                        |
| 6a                            | March 2020                    |       | Further details yet to be made available                                 |                                                                                                                                                                                                                                                                                                                                  |                                                                                        |
| 7a                            | July 2020                     |       | Further details yet to be made available                                 |                                                                                                                                                                                                                                                                                                                                  |                                                                                        |

|                           |                                    |       |                                                                                            |                                                                                                                                                                                                                                                                                                                                                 |                                                                                                 |
|---------------------------|------------------------------------|-------|--------------------------------------------------------------------------------------------|-------------------------------------------------------------------------------------------------------------------------------------------------------------------------------------------------------------------------------------------------------------------------------------------------------------------------------------------------|-------------------------------------------------------------------------------------------------|
| 8a (NCT04400838)<br>[12]  | May 2020<br>–<br>September<br>2021 | 12390 | Randomised,<br>parallel<br>assignment of<br>vaccine for<br>adults 18<br>years and<br>above | Assess the efficacy and safety of the candidate ChAdOx1 nCoV-19 against COVID-19 in adults. [Time Frame: Study duration of 12 months from last vaccination]<br>Measure the number of virologically confirmed (PCR or NAAT positive) symptomatic cases of COVID-19 and occurrence of serious adverse events (SAEs) throughout the study duration |                                                                                                 |
| 9a (NCT04530396)<br>[13]  | September<br>2020 –<br>May 2021    | 33758 | Randomised,<br>parallel<br>assignment of<br>vaccine for<br>adults 18<br>years and<br>above | Investigate the percentage of trial subjects with coronavirus disease 2019 (COVID-19) developed within 6 months after the first dose [Time Frame: through the whole study, an average of 180 days ] and the severity of the clinical course of COVID-19 [ Time Frame: through the whole study, an average of 180 days ]                         | Interim analysis reported that the vaccine is 92% effective based on 20 identified COVID cases. |
| 10a (NCT04436276)<br>[14] | July 2020<br>–<br>February<br>2024 | 60000 | Randomised,<br>parallel<br>assignment of<br>vaccine for<br>adults 18<br>years and<br>above |                                                                                                                                                                                                                                                                                                                                                 | The company pauses its Phase 3 trial to investigate an adverse reaction in a volunteer.         |
| 10b (NCT04614948)<br>[15] | November<br>2020 –<br>May 2023     | 30000 | Randomised,<br>parallel<br>assignment of<br>vaccine for<br>adults 18                       | Investigate the safety and efficacy of a two-dose vaccine                                                                                                                                                                                                                                                                                       |                                                                                                 |

|                        |                                |       |                                                                                                              |                                                                                                                                                                                                                                                                                                                                                                              |                                                                                       |
|------------------------|--------------------------------|-------|--------------------------------------------------------------------------------------------------------------|------------------------------------------------------------------------------------------------------------------------------------------------------------------------------------------------------------------------------------------------------------------------------------------------------------------------------------------------------------------------------|---------------------------------------------------------------------------------------|
|                        |                                |       | years and above                                                                                              |                                                                                                                                                                                                                                                                                                                                                                              |                                                                                       |
| 11a (NCT04526990) [16] | September 2020 – January 2022  | 40000 | Randomised, parallel assignment of vaccine for adults 18 years and above                                     | Investigate the incidence of virologically confirmed COVID-19 disease, and occurrence of solicited and unsolicited AEs [Time frame of 28 days to 12 months post-vaccination and day 0 to 12 months after vaccination, respectively]<br>Investigate the cell-mediated immune profile, the immunogenicity of S-RBD IgG and SC antibody [Time frame of day 28 post vaccination] |                                                                                       |
| 12a (NCT04646590) [17] | December 2020 – April 2022     | 29000 | Randomised, parallel assignment of vaccine for adults 18 years and above with 25% subjects aged 60 and above | Investigate immune persistence by sampling IgG and RBD protein-binding antibody [Timeframe of 14 days and 6 months after full course of vaccination]                                                                                                                                                                                                                         |                                                                                       |
| 13a (NCT04780035) [18] | November 2020 – September 2021 | 3000  | Randomised, parallel assignment of vaccine for adults 18 years and above                                     | Investigate tolerability and AEs upon dual dose of vaccination [Timeframe of day 0 to 9 months of study]<br>Investigate humoral and cell-mediated immune response by evaluating specific neutralising and GMT antibodies.                                                                                                                                                    | Prophylactic efficacy of the vaccine under study is $\geq 50\%$ compared to a placebo |
| 14a (NCT04636697) [19] | November 2020 –                | 30918 | Randomised, parallel                                                                                         | Investigate immediate, solicited, unsolicited and serious AEs [Time frame of                                                                                                                                                                                                                                                                                                 |                                                                                       |

|                        |                            |       |                                                                                     |                                                                                                                                                                                                                                                                                                                                                                |
|------------------------|----------------------------|-------|-------------------------------------------------------------------------------------|----------------------------------------------------------------------------------------------------------------------------------------------------------------------------------------------------------------------------------------------------------------------------------------------------------------------------------------------------------------|
|                        | April 2202                 |       | assignment of vaccine for adults 18 years and above                                 | 30 minutes, 7 days, 21 days and 386 days, respectively].<br>Measuring antibody response by using GMT, SC, GWFR and IgG at day 21, 42, 201, 386.                                                                                                                                                                                                                |
| 15a (NCT04652102) [20] | December 2020 – March 2023 | 36500 | Randomised, parallel assignment of vaccine for adults 18 years and above            | Investigate number of participants and intensity grading of AEs per FDA toxicity grading [Time frame: 29 to 393 days]<br>Recording number of participants with serum vital neutralising antibodies and experience seroconversion to SARS-CoV-2 virus [Time frame of days 1, 29, 43, 57, 120, 211 and 393]                                                      |
| 16a (NCT04655625) [21] | November 2020 – March 2022 | 500   | Randomised, parallel assignment of dual vaccine dosage in healthy adults            | Investigate frequency and severity of treatment-emergent AE [Time frame of first vaccination to 4 <sup>th</sup> week after second vaccination]<br>Investigate change in GMT and IgG subclasses (IgG1 and IgG2) of antibodies; change in neutralising activity and IFN-gamma production against pseudovirus of SARS-CoV-2.                                      |
| 17a (NCT04672395) [22] | March 2021 – July 2022     | 22000 | Randomised, parallel assignment of dual vaccine dosage in adults 18 years and above | Investigate numbers of participants with first occurrence of COVID-19 after vaccination [Time frame of 14 days to 1 year after second dose]<br>Investigate participants with solicited, unsolicited and serious AEs [Time frame of day 29, 43 and 389 days, respectively]<br>Investigate antibody response with GMT, GMFR and SC [Time frame of day 1, 22, 35, |

|                                      |                                           |       |                                                                                                            | 205 and 389]                                                                                                                                                                                                                                                                                                                                                                         |
|--------------------------------------|-------------------------------------------|-------|------------------------------------------------------------------------------------------------------------|--------------------------------------------------------------------------------------------------------------------------------------------------------------------------------------------------------------------------------------------------------------------------------------------------------------------------------------------------------------------------------------|
| 18a (NCT04659239)<br>[23]            | January<br>2021 –<br>July 2022            | 34020 | Randomised,<br>parallel<br>assignment of<br>vaccine for<br>adults 18<br>years and<br>above                 | Investigate the incidence of COVID-19 cases after both doses of vaccination and solicited AEs [Time frame of 14 days to 1 year after second dose]<br>Investigate positive rates of GMT and IgG neutralising antibodies as well as specific T cell assay and occurrence of Antibody-Dependent Enhancement (ADE) [Timeframe of 6 months and 12 months after whole course immunisation] |
| 19a<br>(CTRI/2020/07/026352)<br>[24] | January<br>2021 – no<br>date<br>specified | 1048  | Randomised,<br>adaptive, 18-<br>55 years of age                                                            | Investigate the safety of vaccine.<br>Measure antibody response.                                                                                                                                                                                                                                                                                                                     |
| 20a (NCT04791423)<br>[25]            | March<br>2021 –<br>April 2022             | 10300 | Randomised,<br>stratified,<br>observer-<br>blind,<br>placebo-<br>controlled,<br>aged 18 years<br>and older | Investigate AEs, SAEs, MAAEs, AESI, local and systemic solicited AEs and incidence of COVID-19 cases. [Time frame of day 29 to day 730, 7 days after each dose]<br>Measuring antibody response by using GMTs and GMFRs. [Time frame of day 1 to day 730]                                                                                                                             |
| 21a                                  | March<br>2021                             |       | Further details<br>yet to be made<br>available                                                             |                                                                                                                                                                                                                                                                                                                                                                                      |
| 22a (NCT04691908)<br>[26]            | December<br>2020 –<br>July 2021           | 3000  | Multicenter,<br>randomised,<br>blind,<br>placebo-<br>controlled                                            | Investigate AEs, SAEs and seroconversion. [Time frame of day 0, 21, 42, 90, 180, 1-2 weeks after each dose, throughout the study]<br>Measuring the antibody response and                                                                                                                                                                                                             |

---

frequency of confirmed cases. [Time frame of day 0, 21, 42, 90, 180, 1-2 weeks after each dose, throughout the study,]

---

## References

1. U.S. National Library of Medicine, *Study to Describe the Safety, Tolerability, Immunogenicity, and Efficacy of RNA Vaccine Candidates Against COVID-19 in Healthy Individuals*. 2020.
2. U.S. National Library of Medicine, *A Phase 3 Study to Evaluate the Safety, Tolerability, and Immunogenicity of Multiple Production Lots and Dose Levels of BNT162b2 Against COVID-19 in Healthy Participants*. 2021.
3. U.S. National Library of Medicine, *Study to Evaluate the Safety, Tolerability, and Immunogenicity of SARS CoV-2 RNA Vaccine Candidate (BNT162b2) Against COVID-19 in Healthy Pregnant Women 18 Years of Age and Older*. 2021.
4. U.S. National Library of Medicine, *A Study to Evaluate Efficacy, Safety, and Immunogenicity of mRNA-1273 Vaccine in Adults Aged 18 Years and Older to Prevent COVID-19*. 2020.
5. Diamond, M.S. and Pierson, T.C., The challenges of vaccine development against a new virus during a pandemic. *Cell Host & Microbe*, **2020**. 27(5): p. 699-703.
6. U.S. National Library of Medicine, *A Study to Evaluate the Safety, Reactogenicity, and Effectiveness of mRNA-1273 Vaccine in Adolescents 12 to <18 Years Old to Prevent COVID-19 (TeenCove)*. 2020.
7. U.S. National Library of Medicine, *Clinical Trial of Efficacy and Safety of Sinovac's Adsorbed COVID-19 (Inactivated) Vaccine in Healthcare Professionals (PROFISCOV)*. 2020.
8. U.S. National Library of Medicine, *Efficacy, Safety and Immunogenicity Study of SARS-CoV-2 Inactivated Vaccine (COVID-19)*. 2020.
9. U.S. National Library of Medicine, *Clinical Trial For SARS-CoV-2 Vaccine (COVID-19)*. 2020.
10. Chinese Clinical Trial Registry, *A Phase III clinical trial for inactivated novel coronavirus pneumonia (COVID-19) vaccine (Vero cells)*. 2020.
11. India National Institute of Medical Statistics, *A Phase 3, Randomized, Double-blind, Placebo-controlled, Multicenter Study to Evaluate the Efficacy, Safety, Immunogenicity, and Lot-to-Lot consistency of BBV152, a Whole virion Inactivated Vaccine in Adults greater than or equal to 18 Years of Age*. 2020.
12. U.S. National Library of Medicine, *Investigating a Vaccine Against COVID-19*. 2020.



13. U.S. National Library of Medicine, *Clinical Trial of Efficacy, Safety, and Immunogenicity of Gam-COVID-Vac Vaccine Against COVID-19 (RESIST)*. 2020.
14. U.S. National Library of Medicine, *A Study of Ad26.COV2.S in Adults (COVID-19)*. 2020.
15. U.S. National Library of Medicine, *A Study of Ad26.COV2.S for the Prevention of SARS-CoV-2-mediated COVID-19 in Adults (ENSEMBLE 2)*. 2020.
16. U.S. National Library of Medicine, *Phase III Trial of A COVID-19 Vaccine of Adenovirus Vector in Adults 18 Years Old and Above*. 2020.
17. U.S. National Library of Medicine, *A Phase III Clinical Trial to Determine the Safety and Efficacy of ZF2001 for Prevention of COVID-19*. 2020.
18. U.S. National Library of Medicine, *Study of the Tolerability, Safety, Immunogenicity and Preventive Efficacy of the EpiVacCorona Vaccine for the Prevention of COVID-19*. 2020.
19. U.S. National Library of Medicine, *Study of a Recombinant Coronavirus-Like Particle COVID-19 Vaccine in Adults*. 2020.
20. U.S. National Library of Medicine, *A Study to Determine the Safety and Efficacy of SARS-CoV-2 mRNA Vaccine CVnCoV in Adults for COVID-19*. 2020.
21. U.S. National Library of Medicine, *Phase II / III Study of COVID-19 DNA Vaccine (AG0302-COVID19)*. 2020.
22. U.S. National Library of Medicine, *A Controlled Phase 2/3 Study of Adjuvanted Recombinant SARS-CoV-2 Trimeric S-protein Vaccine (SCB-2019) for the Prevention of COVID-19 (SCB-2019)*. 2021.
23. U.S. National Library of Medicine, *The Efficacy, Safety and Immunogenicity Study of Inactivated SARS-CoV-2 Vaccine for Preventing Against COVID-19*. 2020.
24. India National Institute of Medical Statistics, *A prospective, randomized, adaptive, phase I/III clinical study to evaluate the safety and immunogenicity of Novel Corona Virus -2019-nCov vaccine candidate of M/s Cadila Healthcare Limited by intradermal route in healthy subjects*. 2020.
25. U.S. National Library of Medicine, *Study of GRAd-COV2 for the Prevention of COVID-19 in Adults (COVITAR)*. 2021.
26. U.S. National Library of Medicine, *Immunogenicity, Efficacy and Safety of QazCovid-in® COVID-19 Vaccine*. 2020.
